# Supplementary material
Source: MDPI journal article supplement (https://www.mdpi.com/2227-9717/12/2/247)
Supplement: s1 [file s1]

## Supplementary files

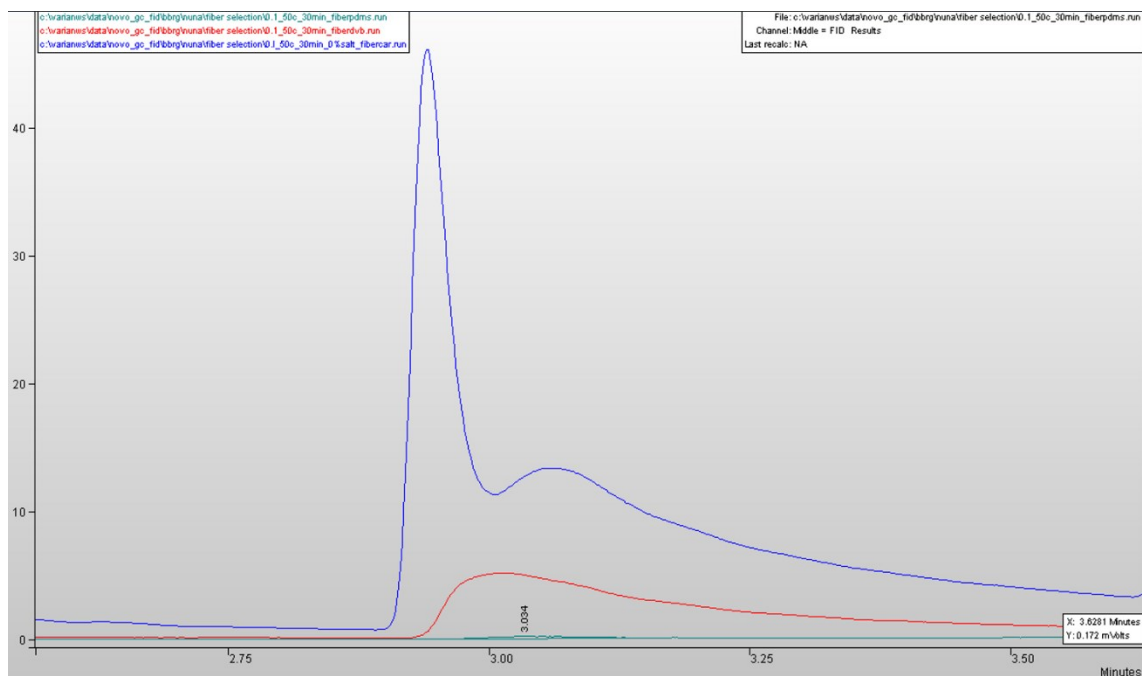

Figure S1 – Chromatograms for fiber selection, corroborating the results presented in Figure 2.

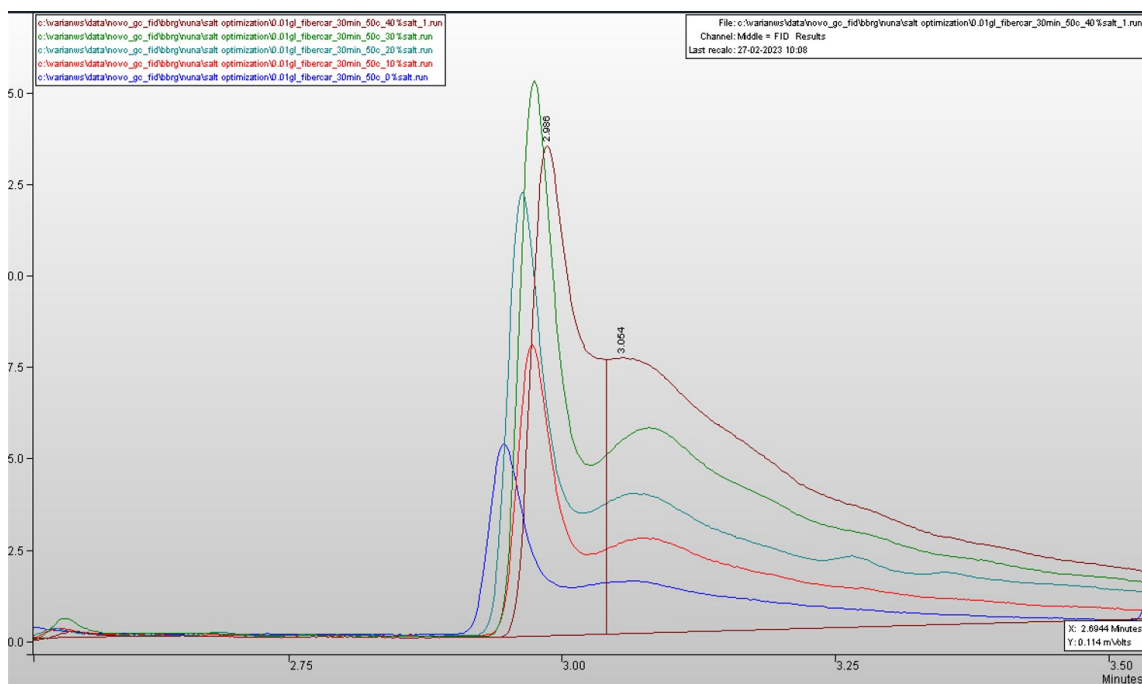

Figure S2 – Chromatograms for salt concentration selection, corroborating the results presented in Figure 3.

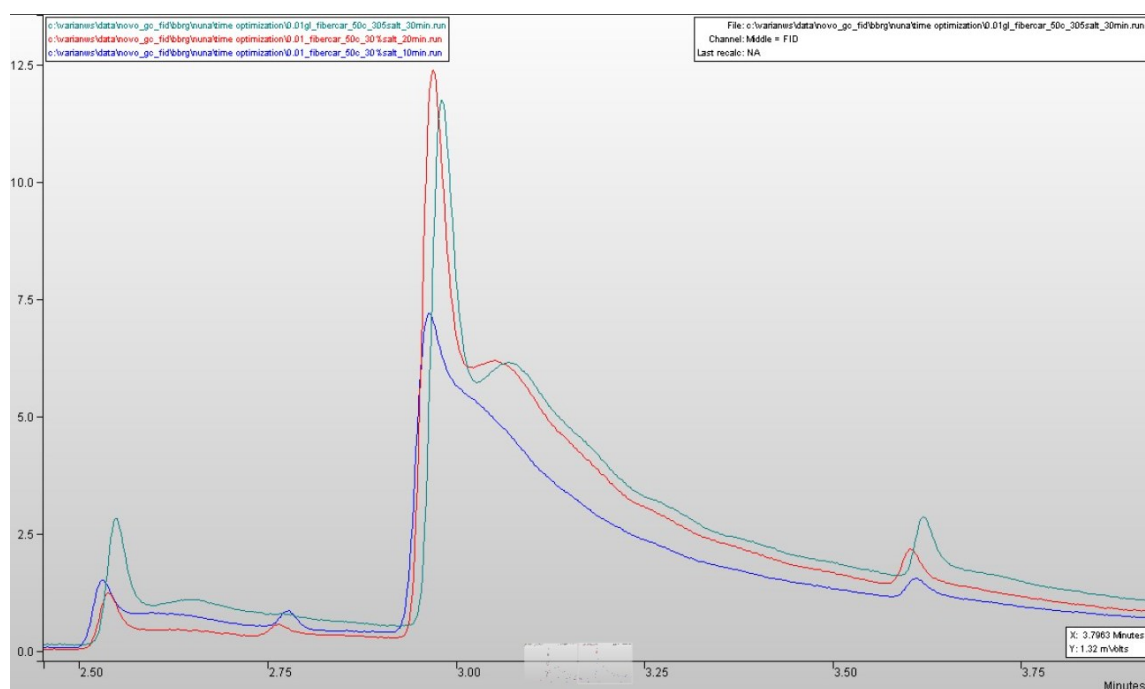

Figure S3 – Chromatograms for time selection, corroborating the results presented in Figure 4.

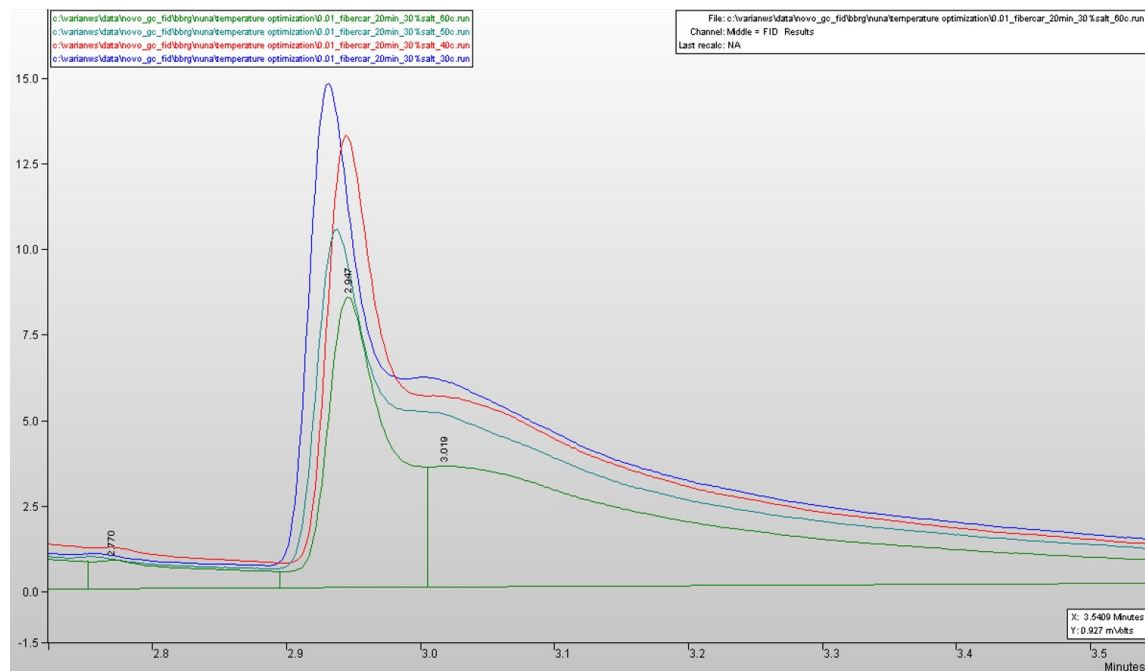

Figure S4 – Chromatograms for temperature selection, corroborating the results presented in Figure 5.

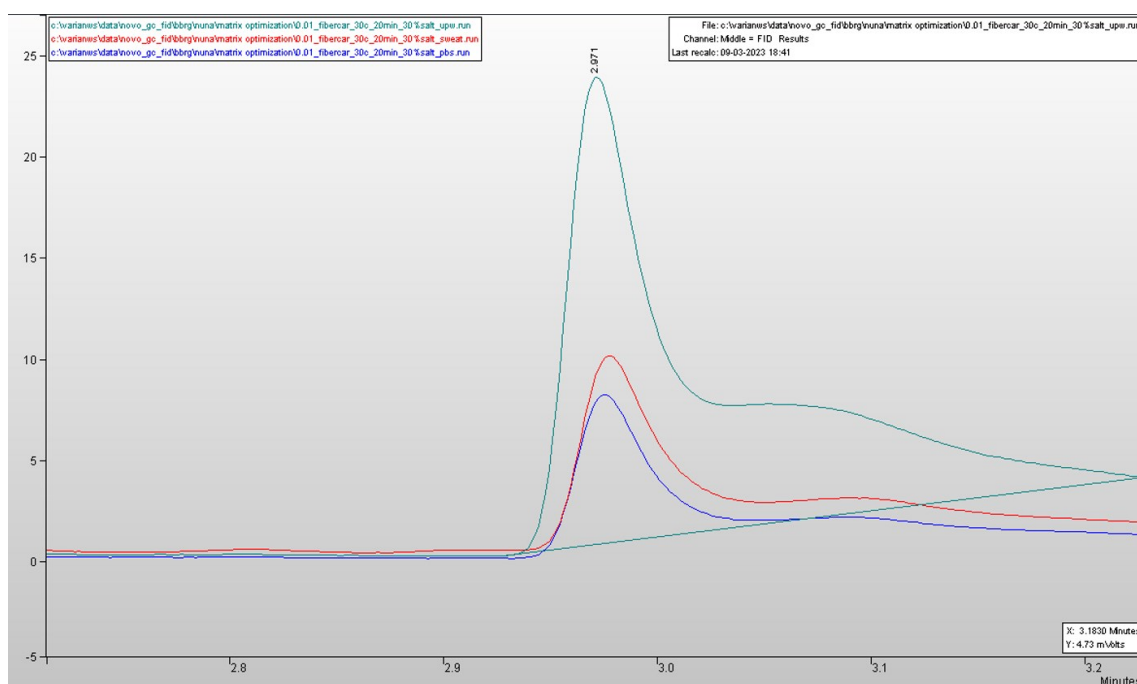

Figure S5 – Chromatograms for matrix selection, corroborating the results presented in Figure 6.

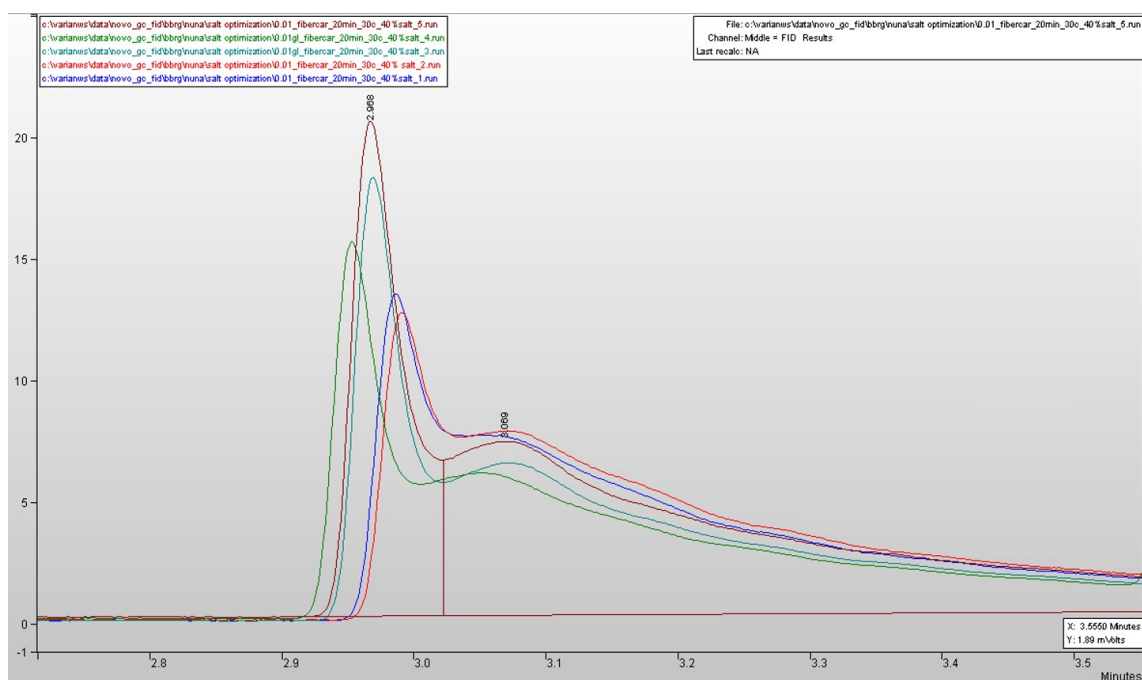

Figure S6 – Chromatogram of different samples tested in 40% salt, indicating that the 40% NaCl concentration was impractical and lacked reproducibility.
